# Supplementary material
Source: PubMed Central journal article supplement (PMC3737305)
Supplement: cc-12-2024-s01.pdf [file cc-12-2024-s01.pdf]

## **Supplemental Material to:**

**Norbert Berndt, Ronil Patel, Hua Yang, Maria E. Balasis and  
Saïd M. Sebti**

**Akt2 and acid ceramidase cooperate to induce cell  
invasion and resistance to apoptosis**

**2013; 12(13)**

**<http://dx.doi.org/10.4161/cc.25043>**

**<http://www.landesbioscience.com/journals/cc/article/25043>**

**Fig. S1**

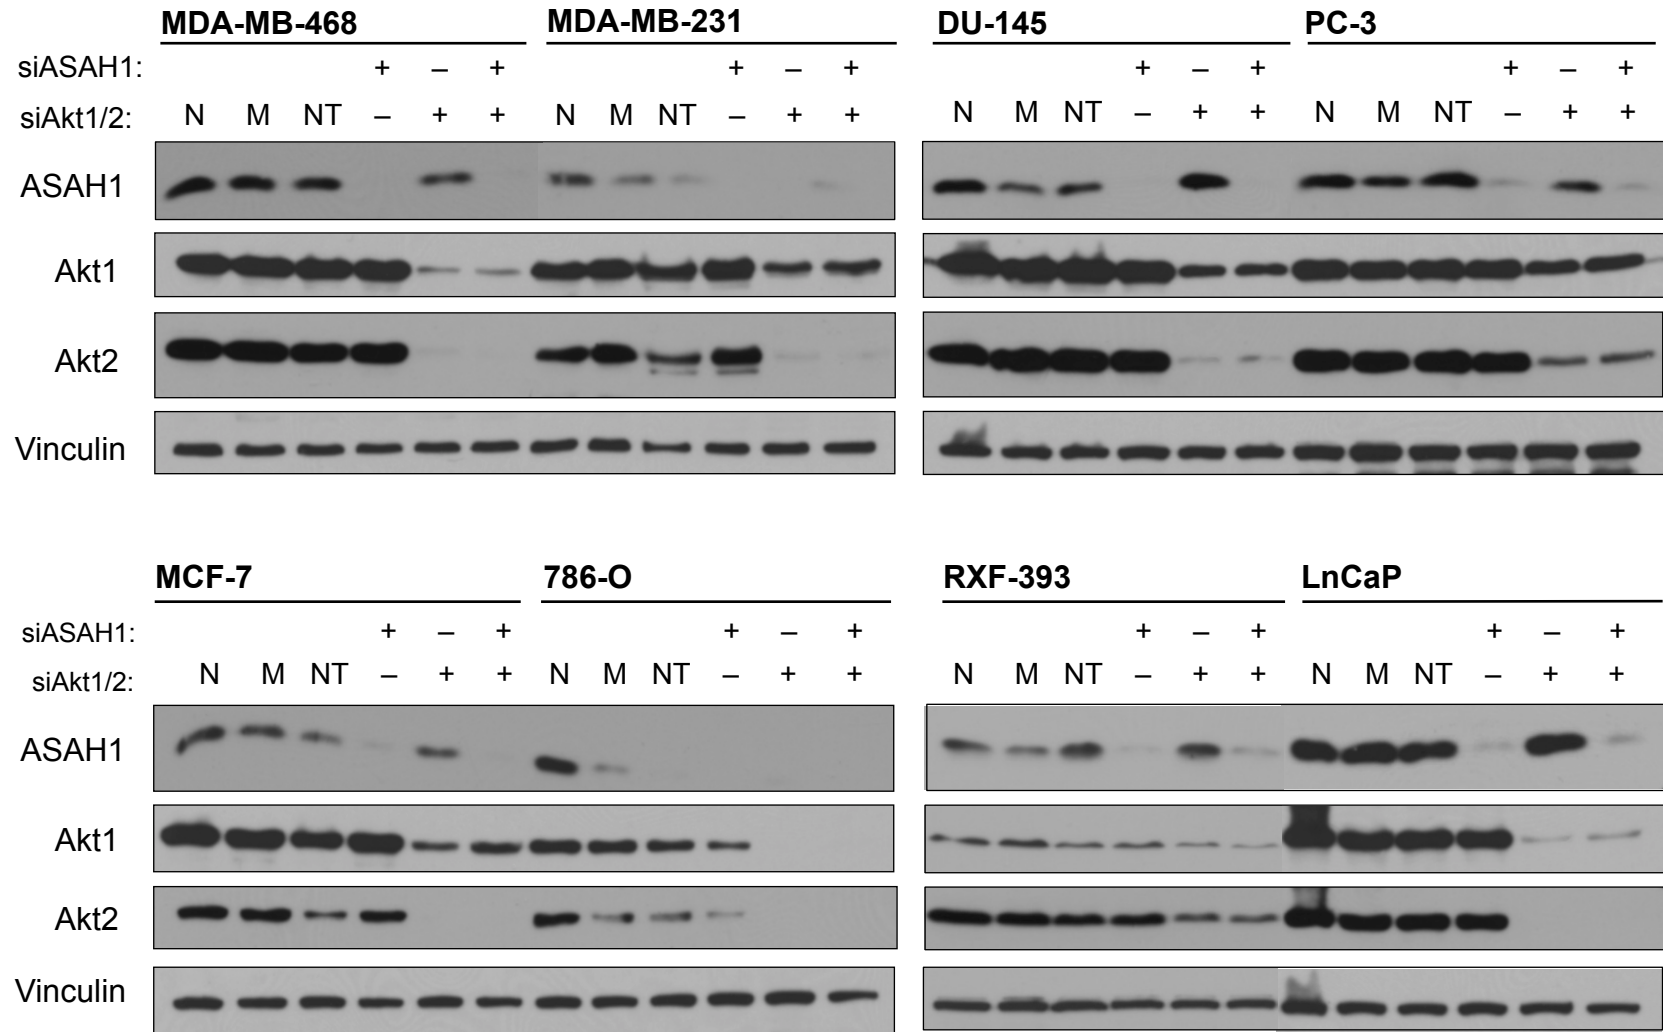

## Fig. S1 continued

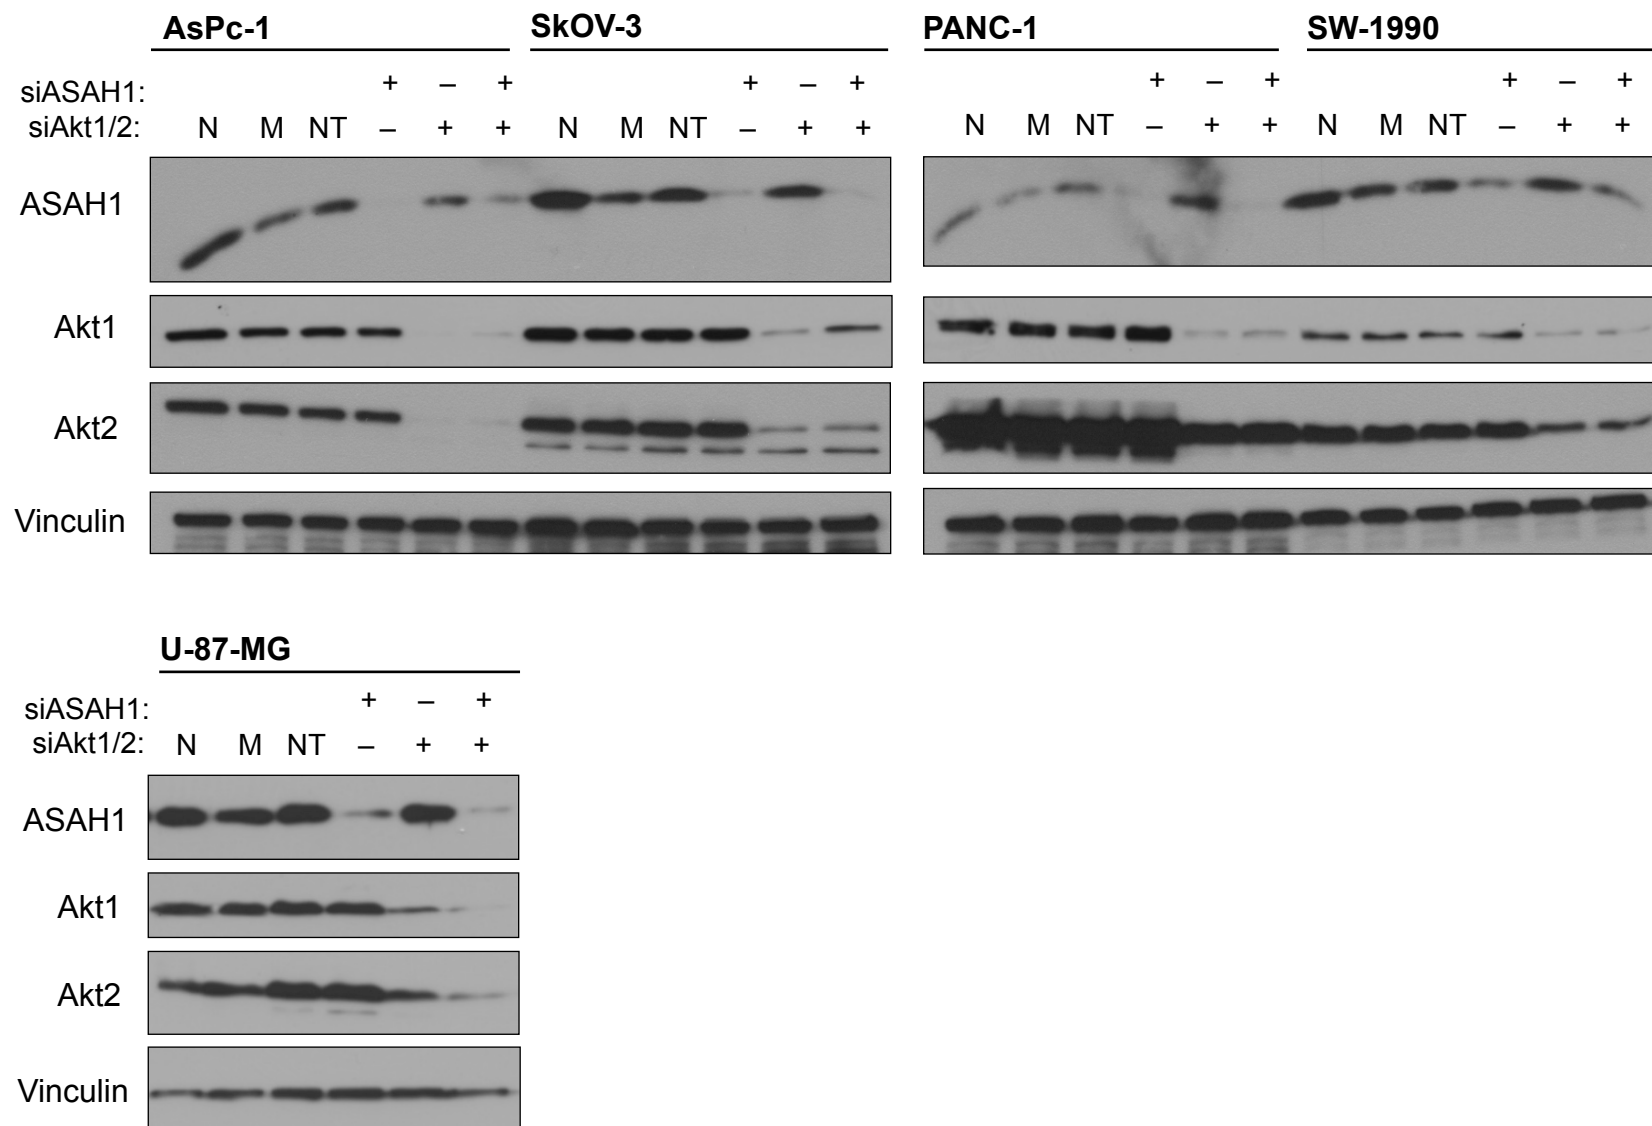

**Figure S1 (related to Figure 3). Knockdown efficiency of siASA1 and/or siAkt1/2 in 13 cancer cell lines.** To elucidate whether the observed phenotype was target-specific, we examined the knockdown efficiency of the siRNAs in sister cultures set up in parallel in 6-well plates. Cells were harvested 48 h post-transfection and processed for Western blotting with antibodies to ASA1, Akt1, Akt2 and vinculin.

# Fig. S2

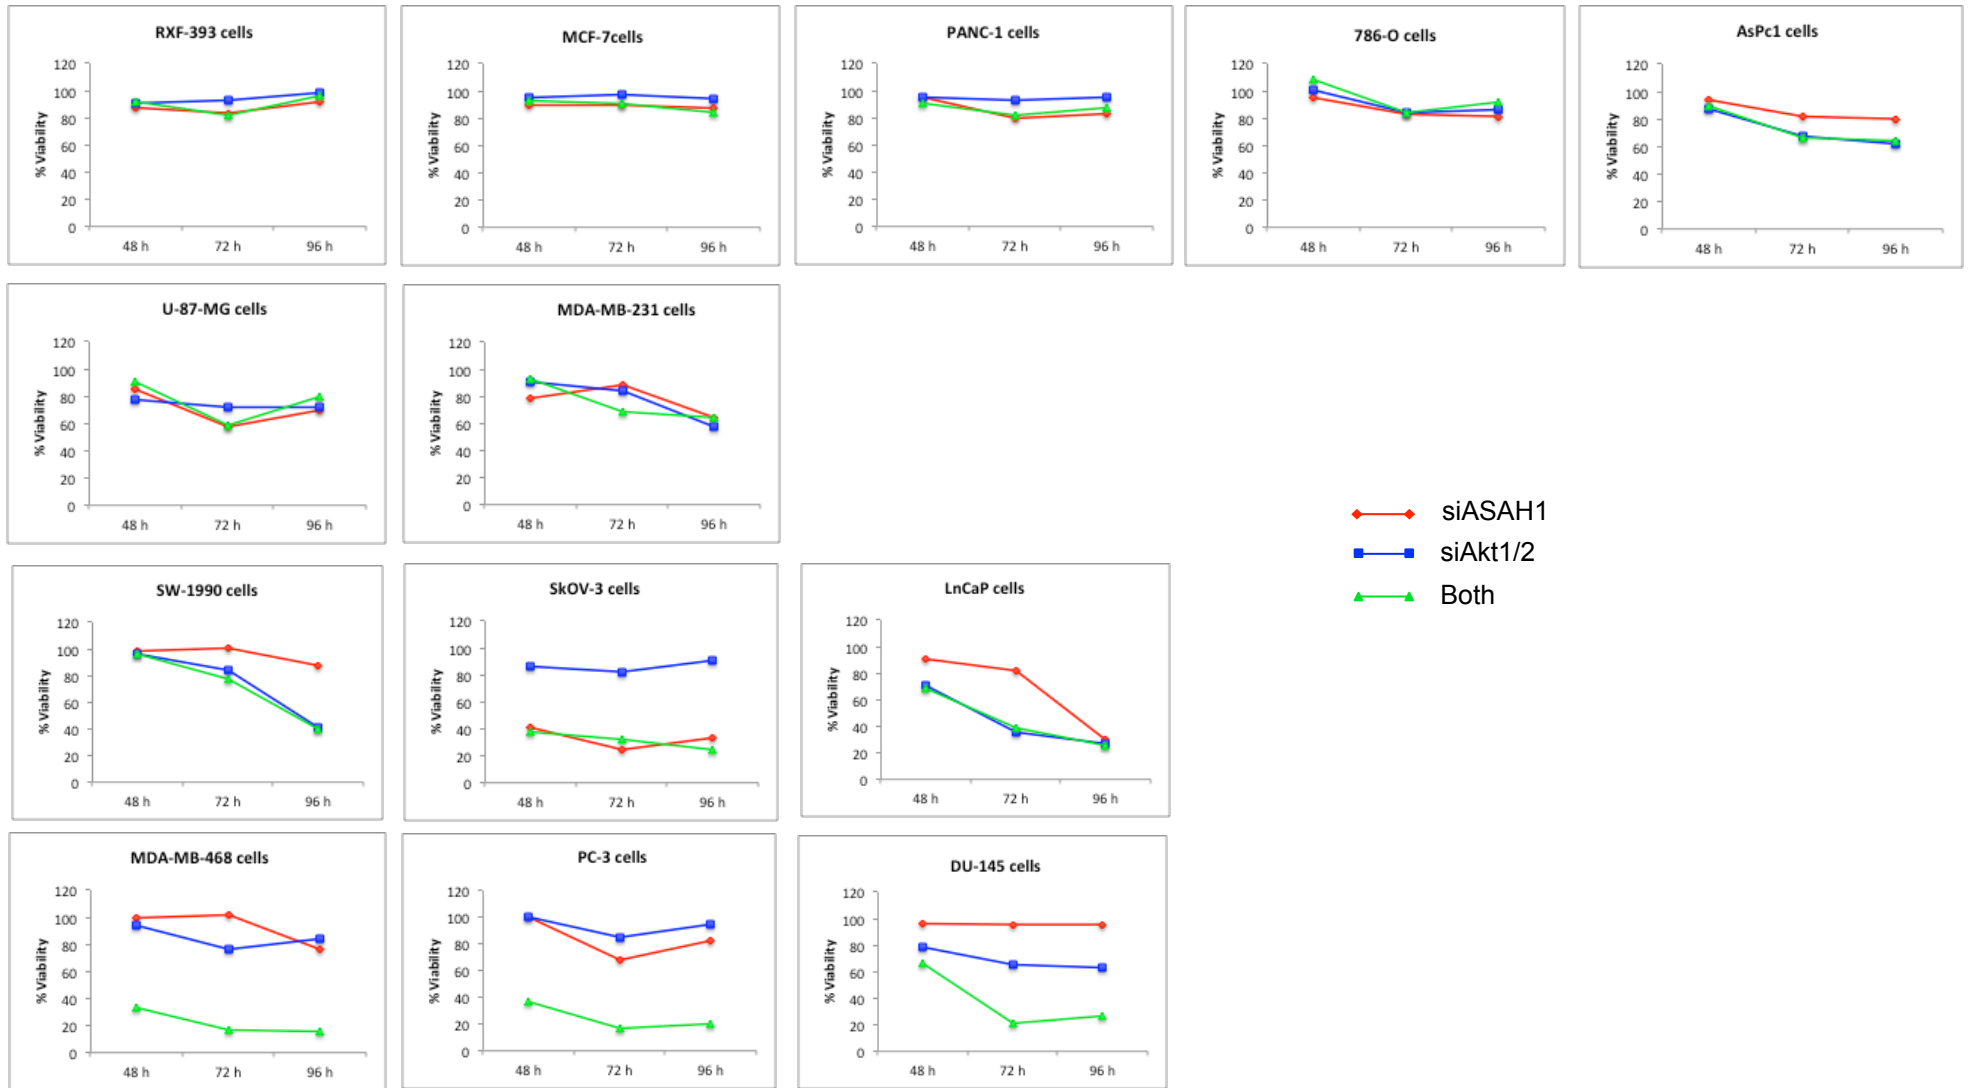

**Figure S2 (related to Figure 3). Depletion of siASA1 and/or siAkt1/2 affects proliferation/viability in a cell type-dependent manner.** This figure shows the proliferation/viability of 13 cancer cell lines 48, 72, and 96 h post-transfection with 20 nM siRNA targeting ASA1, Akt1/2 or both, in percent of the viability of cells treated with non-targeting siRNA.

## Table S1

| <b>Cells</b> | <b>TCN + B13</b> | <b>MK-2206 + B13</b> |
|--------------|------------------|----------------------|
| MDA-MB-468   | 0.20±0.10        | 0.55±0.29            |
| PC-3         | 0.42±0.33        | 0.37±0.24            |

**Table S1 (related to Fig. 5).** Average combination indices following treatment with TCN and B13 or MK-2206 and B13. In the combinations, the drugs were used at a constant concentration ratio of 1:1.
